# Supplementary material
Source: PubMed Central journal article supplement (PMC2396693)
Supplement: 0802467105_Supplemental_PDF.pdf [file 0802467105_Supplemental_PDF.pdf]

# Supporting Information

Zhang *et al.* 10.1073/pnas.0802467105

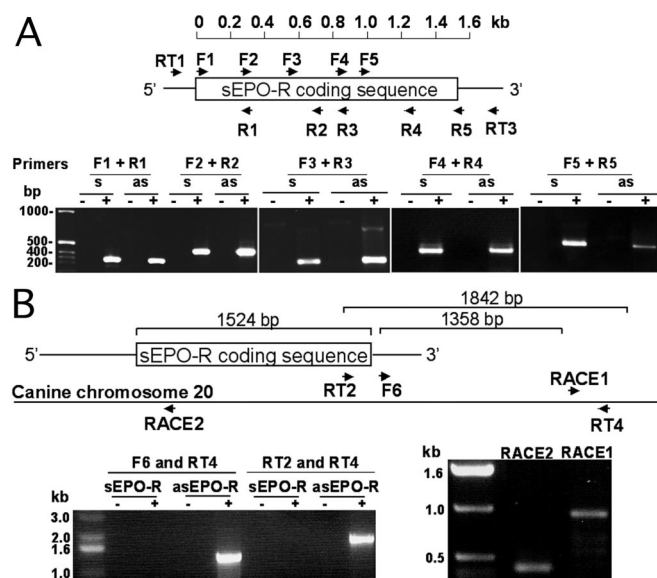

**Fig. S1.** Amplification of sEPO-R and asEPO-R transcripts. (A) Strand-specific RT-PCR of sEPO-R and asEPO-R transcripts within the EPO-R-coding region. First-strand cDNA was synthesized with primer RT3 for sEPO-R, and with RT1 for asEPO-R. PCR primers are shown as either forward (F) or reverse (R). (Upper) Location of primers. (Lower) Representative gels of RT-PCR products with different combination of primer pairs. s, sEPO-R; as, asEPO-R; dash, negative reaction control in which no reverse transcriptase was included in the RT step, plus sign, all components added in the RT reactions. (B) Amplification of asEPO-R transcripts in noncoding regions of EPO-R. For strand-specific PCR, first-strand cDNA was synthesized with primer RT-4 for sEPO-R, and with RT-2 for asEPO-R. (Upper) Location of primers. (Lower left) Representative gel of strand-specific RT-PCR. (Right) RACE PCR for 5' end (RACE1) and 3' end (RACE2) of asEPO-R cDNA.

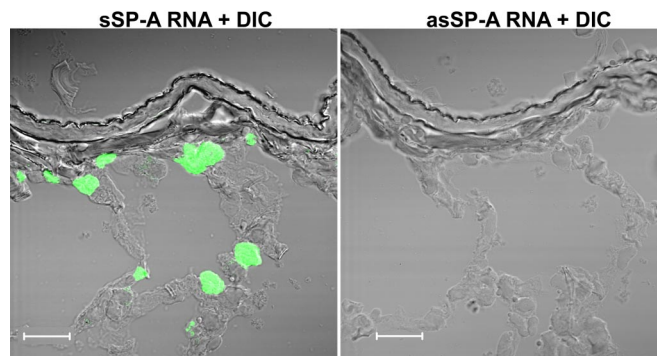

**Fig. S2.** *In situ* hybridization of canine SP-A transcripts as a lung-specific control gene. (*Left*) Sense SP-A mRNA (green) was detected by antisense SP-A cRNA probe superimposed on the corresponding DIC image (positive control). (*Right*) No signal was detected for antisense SP-A mRNA using sense SP-A cRNA probe (negative control). (Scale bar, 20  $\mu\text{m}$ .)

**Table S1. Oligonucleotide primers**

| Primer | Sequence (5' to 3')      | Location (relative to EPO-R coding region) | Use                                          |
|--------|--------------------------|--------------------------------------------|----------------------------------------------|
| RT1    | ACTTGGAGGCGCCTGGCCAGGA   | 5' UTR                                     | Synthesize first-strand asEPO-R cDNA         |
| RT2    | ACAGCCCCTTCTTAAACC       | Exon 8                                     | Synthesize first-strand asEPO-R cDNA, RT-PCR |
| RT3    | CCAGAATTTCACTGAGC        | 3' UTR                                     | Synthesize first-strand sEPO-R cDNA          |
| RT4    | AGGAAGAGGAAGAGAGTGG      | 3' UTR                                     | Synthesize first-strand sEPO-R cDNA, RT-PCR  |
| RACE1  | GGCATGATAGGTACATGG       | 3' UTR                                     | As EPO-R 5'end race                          |
| RACE2  | GTGGATGATGCGGCGATAGAGC   | Exon 3                                     | As EPO-R 3'end race                          |
| F1     | ATGAATCACCTATGGACGCACC   | Exon 1 (start codon)                       | RT-PCR                                       |
| F2     | GGTCGGCCAGACAACTACA      | Exon 2                                     | RT-PCR                                       |
| F3     | ATCTCAGGCAGCGTCGCAGG     | Exon 4                                     | RT-PCR                                       |
| F4     | GACGCTGTCTCTCATTCTCG     | Exon 6                                     | RT-PCR, RNA probe synthesis                  |
| F5     | CCACCCACAAGGGTAACTCCAGC  | Exon 7                                     | RT-PCR                                       |
| F6     | AGGGGCAGCAGTAAAAGG       | 3' UTR                                     | RT-PCR                                       |
| R1     | AGGCTGCACGTTTTCCAGG      | Exon 3                                     | RT-PCR                                       |
| R2     | GCGCGAACCATGAAGGTGTAACG  | Exon 5                                     | RT-PCR                                       |
| R3     | CCAGCAGCAGCAGGATGAGC     | Exon 6                                     | RT-PCR                                       |
| R4     | CATGGCTACTATGTCCAAACTGC  | Exon 8                                     | RT-PCR, RNA probe synthesis                  |
| R5     | GAGTCCTAGGAGCAGGCCACATAG | Exon 8 (stop codon)                        | RT-PCR                                       |
